# Supplementary material for: New organic ionic plastic crystals utilizing the morpholinium cation
Source: Royal Society of Chemistry journal article supplement (doi:10.1039/d3cp00759f), 2023-01-01
Supplement: d3cp00759f1.pdf [file d3cp00759f1.pdf]

New organic ionic plastic crystals utilizing the morpholinium cation

Azra Sourjah, Colin S. M. Kang, Cara M. Doherty, Durga Acharya, Luke A. O'Dell and Jennifer M. Pringle

Supplementary Information

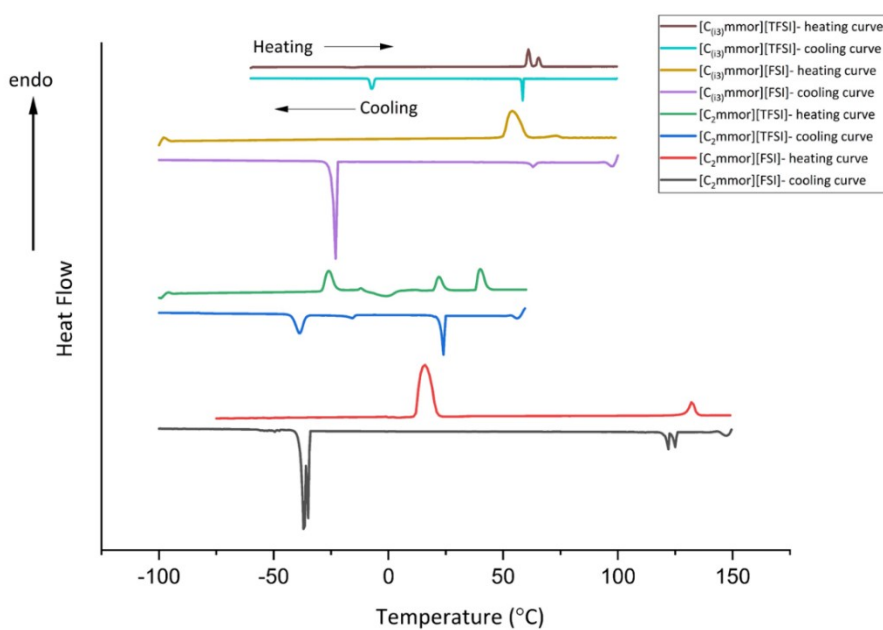

Figure S1: DSC traces of all four morpholinium -based salts. Heating and cooling curves were obtained from the second cycle. For  $[C_2mmor][FSI]$ ,  $[C_2mmor][TFSI]$  and  $[C_{133}mmor][FSI]$  the scan rate was  $10\text{ }^\circ\text{C min}^{-1}$ . For  $[C_{133}mmor][TFSI]$  scan rate was  $2\text{ }^\circ\text{C min}^{-1}$

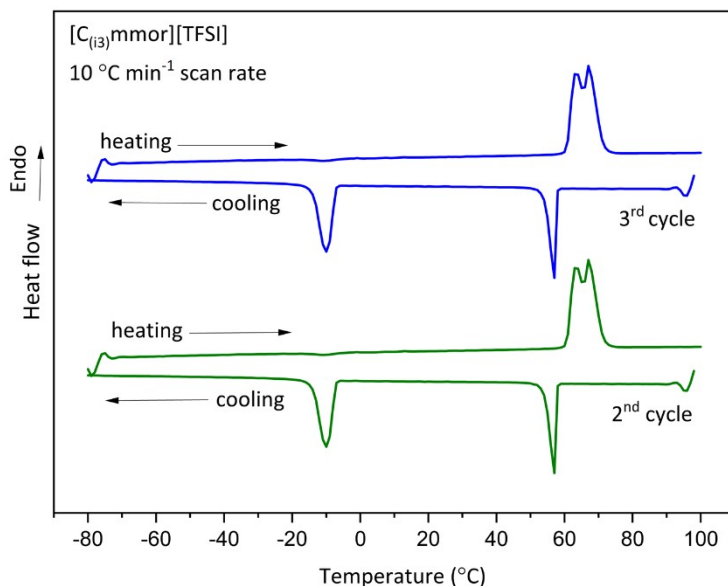

Figure S2: DSC thermogram of the  $[C_{133}mmor][TFSI]$  salt, scan rate  $10\text{ }^\circ\text{C min}^{-1}$ . 2<sup>nd</sup> heating and cooling curves are shown in green. 3<sup>rd</sup> heating and cooling curves are shown in red, respectively.

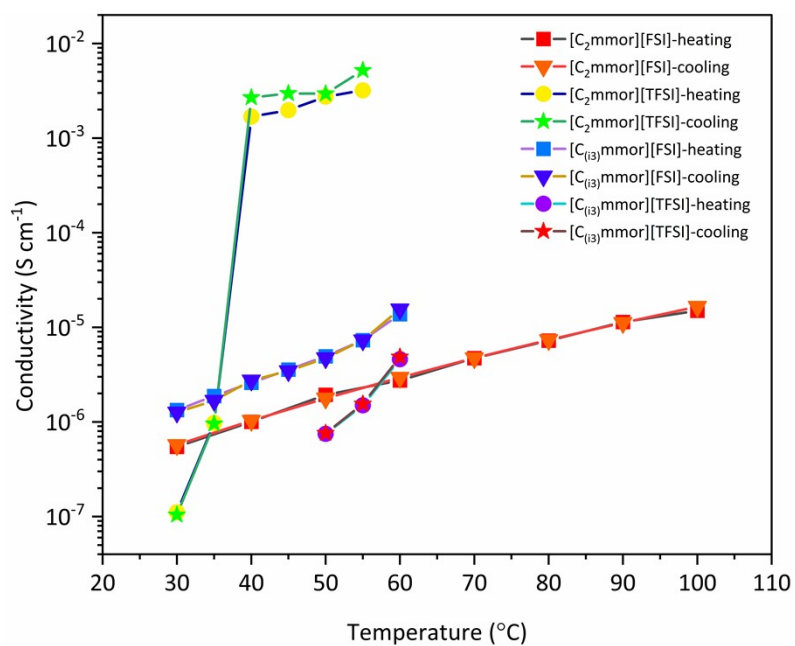

Figure S3: The combined heating and cooling ionic conductivity values of the morpholinium salts

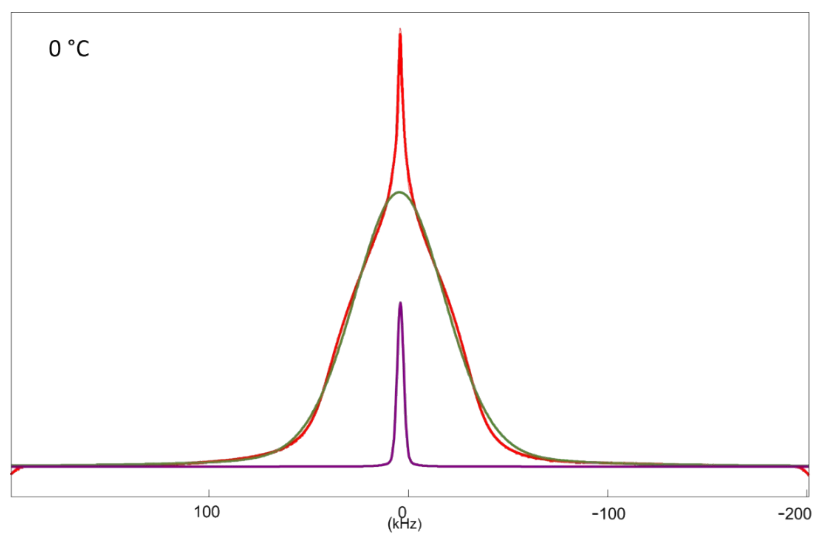

Figure S4: Solid-state NMR deconvolution fitting using DMfit software of [C<sub>2</sub>mmor][FSI] at 0 °C. The green peak represents broad component, and the purple peak represents the narrow component. The red peak is the cumulative peak.

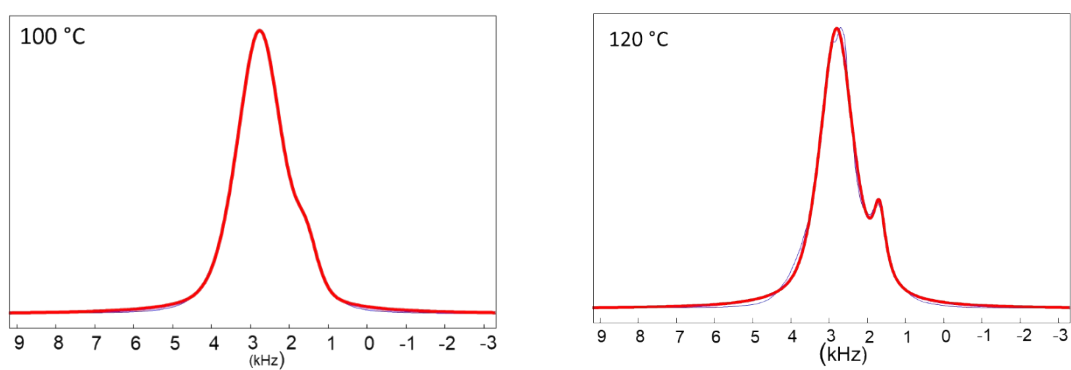

Figure S5 : For  $[C_2mmor][FSI]$  in Phase I, a small proportion of more dynamic cations start growing at higher temperatures. The peak becomes distinguishable from 100 °C onwards. This could be due to two different proton environments in the cationic structure that get resolved when the temperature is increased.

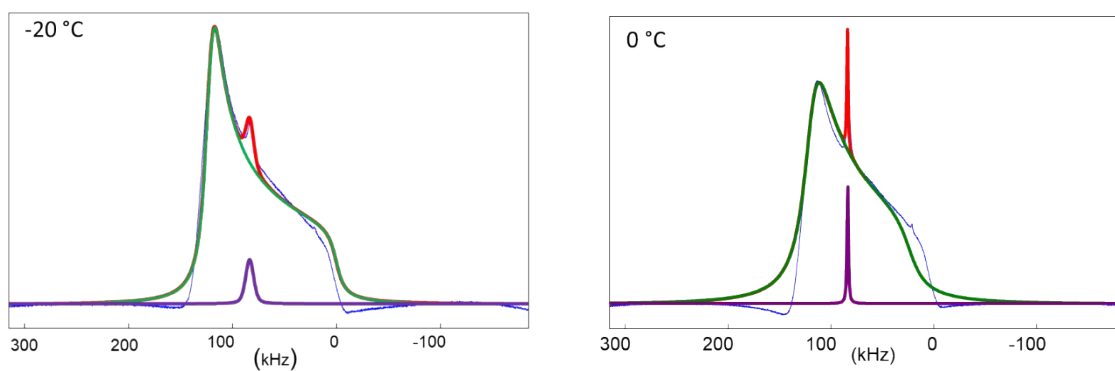

Figure S6: The deconvolution of the broad asymmetric peaks of  $[C_2mmor][FSI]$  considering CSA parameters at -20 °C and 0 °C

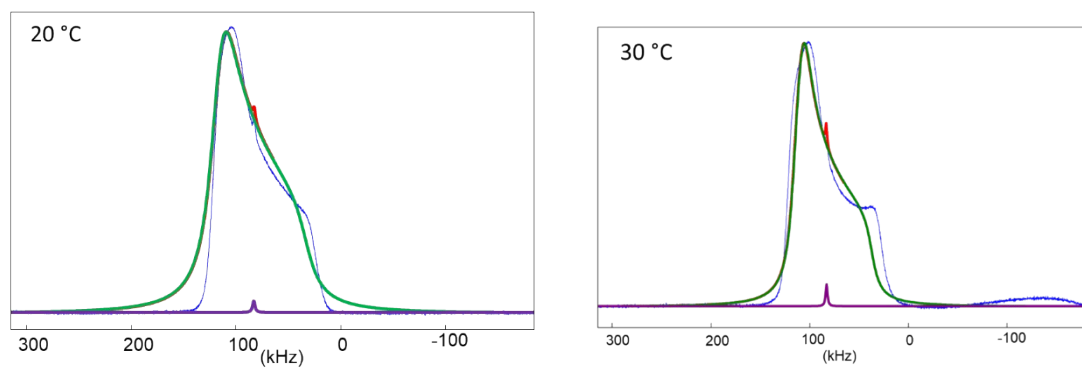

Figure S7: The deconvolution of the broad asymmetric peaks of  $[C_{(13)}mmor][FSI]$  considering CSA parameters at 20 °C and 30 °C

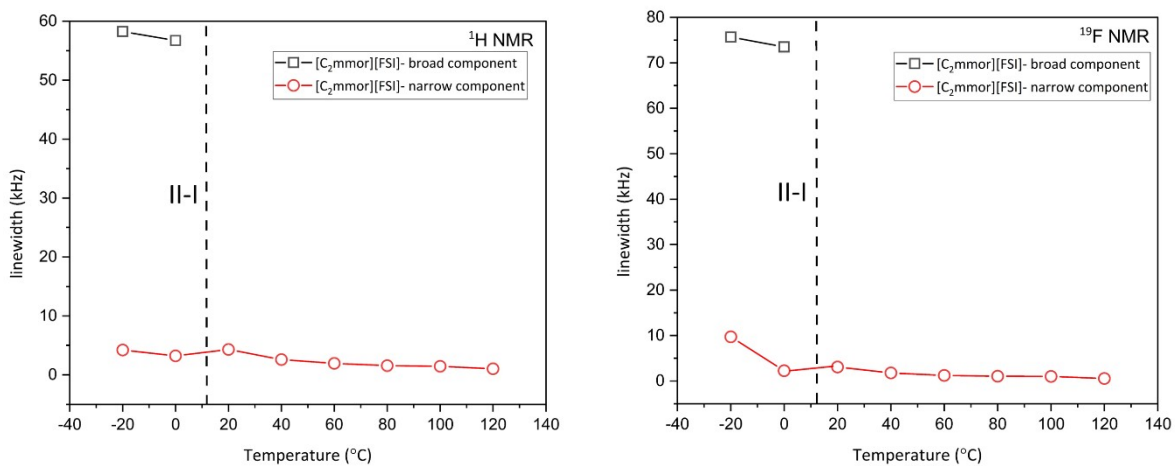

Figure S8: linewidth analysis of  $[C_2mmor][FSI]$  :static  $^1H$  NMR (left) and  $^{19}F$  NMR (right)

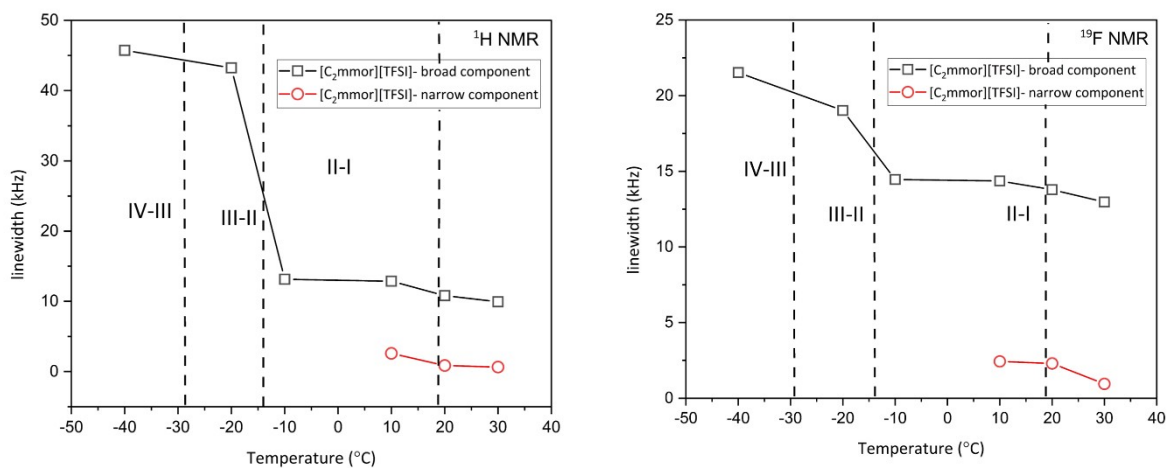

Figure S9: linewidth analysis of  $[C_2mmor][TFSI]$ : static  $^1H$  NMR (left) and  $^{19}F$  NMR(right)

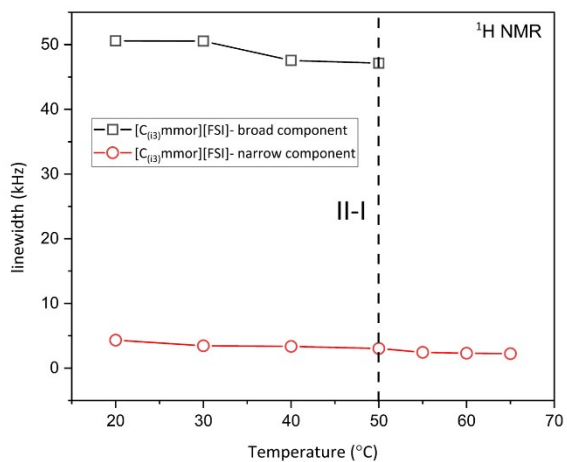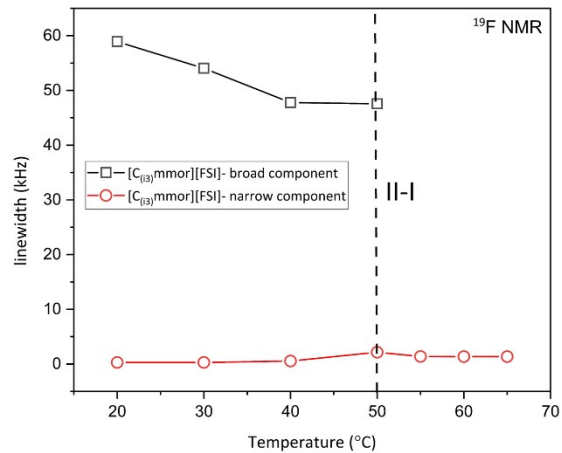

Figure S10:linewidth analysis of [C<sub>(13)</sub>mmor][FSI]: <sup>1</sup>H static NMR (left) and <sup>19</sup>F NMR (right)

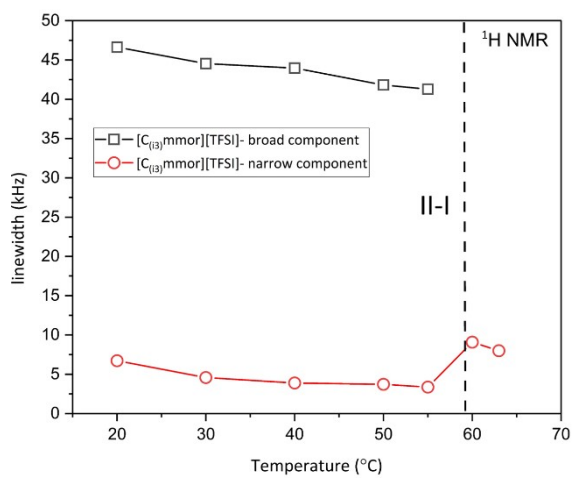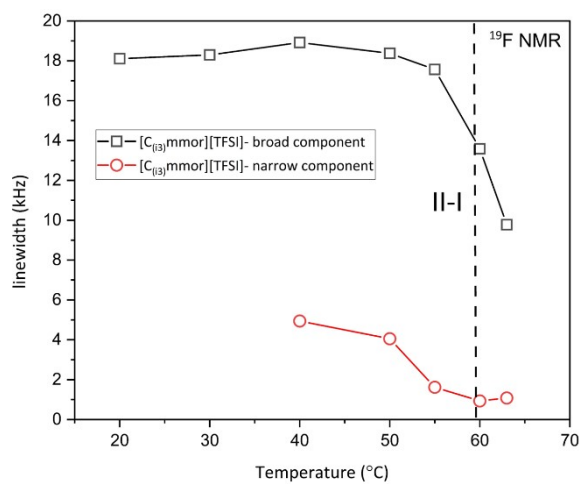

Figure S11:linewidth analysis of [C<sub>(13)</sub>mmor][TFSI]: <sup>1</sup>H NMR (left) and <sup>19</sup>F NMR (right)

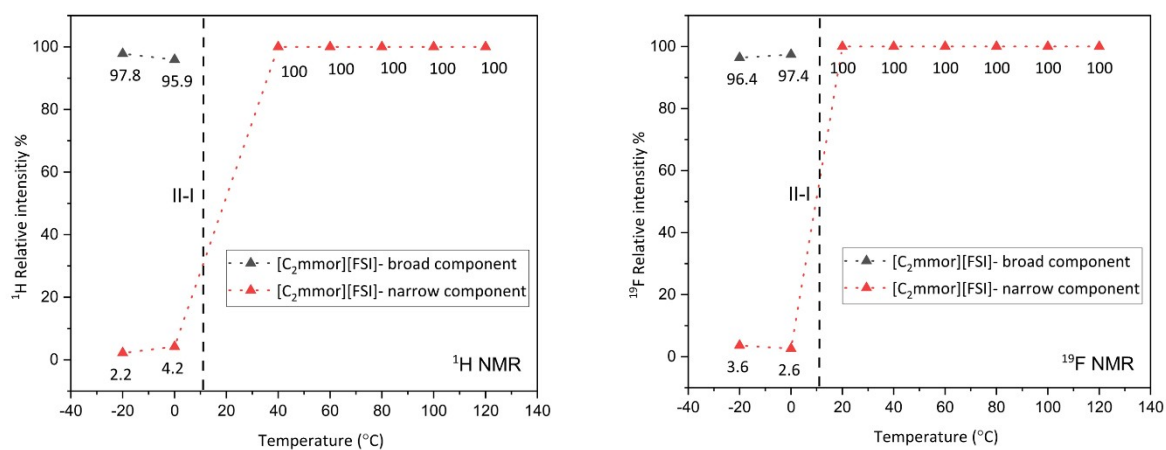

Figure S12: solid-state NMR, Temperature vs relative intensity percentage values for  $[C_2mmor][FSI]$  salt:  $^1H$  NMR (left) and  $^{19}F$  NMR (right). A quantitative analysis can be made of the fraction of relatively static and more dynamic cations at the respective temperatures.

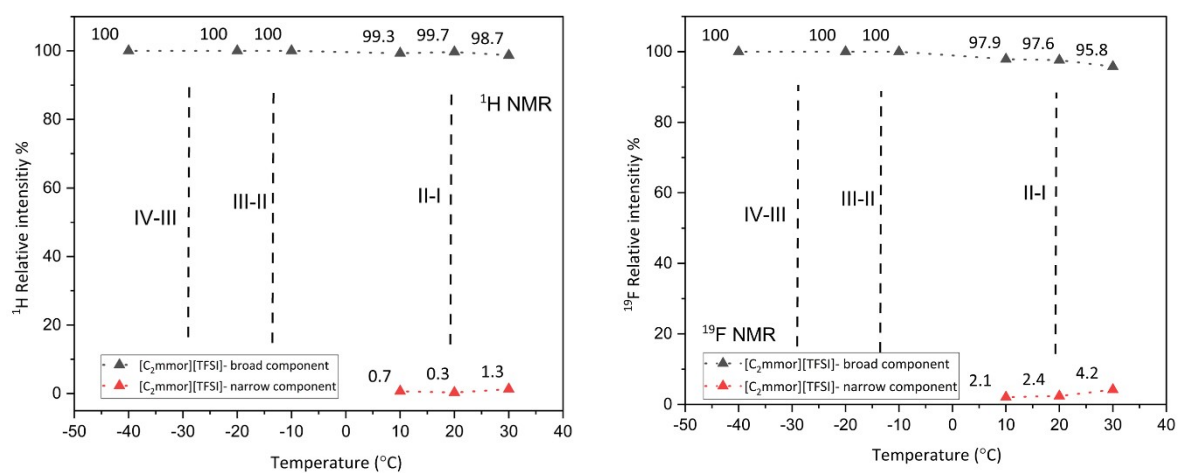

Figure S13: solid-state NMR, temperature vs relative intensity percentage values for  $[C_2mmor][TFSI]$  salt:  $^1H$  NMR (left) and  $^{19}F$  NMR (right).

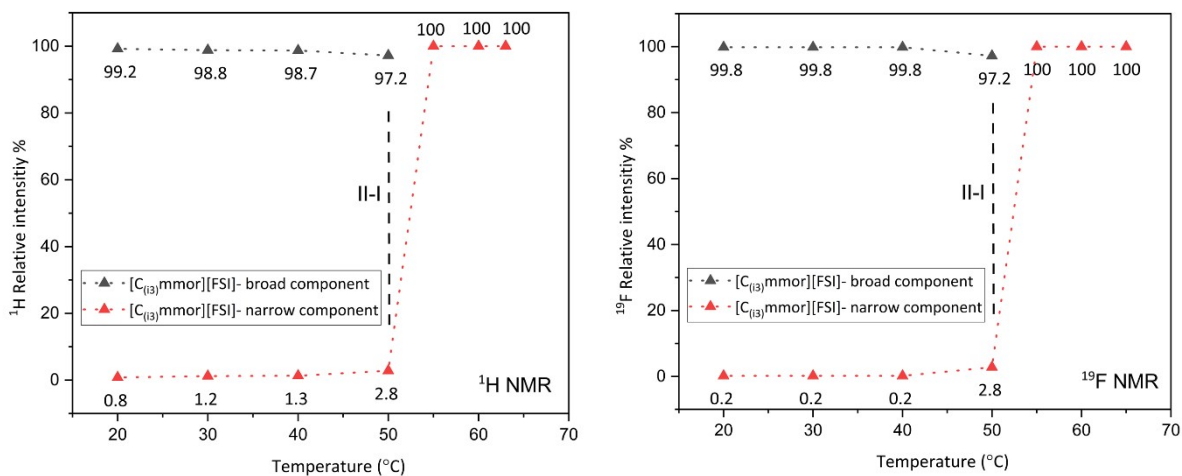

Figure S14: solid-state NMR, temperature vs relative intensity percentage values for  $[C_{13}mmor][FSI]$  salt:  $^1H$  NMR (left)  $^{19}F$  NMR (right).

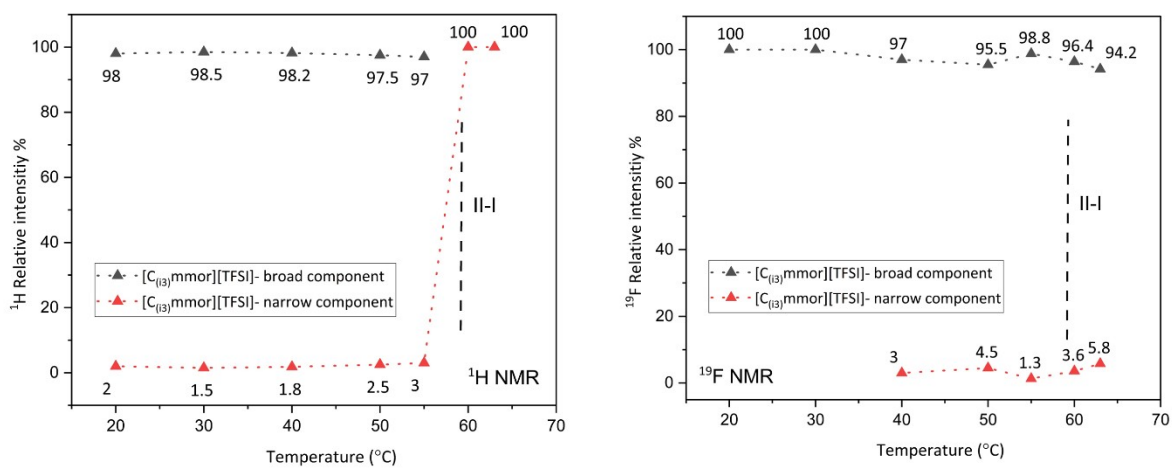

Figure S15: solid-state NMR, temperature vs relative intensity percentage values for  $[C_{13}mmor][TFSI]$  salt:  $^1H$  NMR (left)  $^{19}F$  NMR (right).
